# Supplementary material
Source: PubMed Central journal article supplement (PMC8512607)
Supplement: NIHMS1709778-supplement-4.pdf [file NIHMS1709778-supplement-4.pdf]

**Table S1.** Primers used for *CLNI* deletion by homologous recombination.

| <b>Primer</b>   | <b>Sequence</b>                                                        | <b>Use</b>   |
|-----------------|------------------------------------------------------------------------|--------------|
| <i>CLNI</i> 5'  | AGATCATGAACCACTCAGAAGTGAAAAGTGGGTTAATTG<br>TCACTG CGGATCCCCGGGTTAATTAA | Deletion     |
| <i>CLNI</i> 3'  | TGTAGGCTTGATGAGAAAATGGTCACAGTTGAGAGCTATT<br>GTG GAATTCGAGCTCGTTTAAAC   | Deletion     |
| <i>CLNI</i> (A) | TTTTGCTGACAATACATTTTAAACGA                                             | Confirmation |
| <i>CLNI</i> (D) | CATTACTTACGATGGAAAAGCG                                                 | Confirmation |
