# Supplementary material
Source: PubMed Central journal article supplement (PMC8512607)
Supplement: NIHMS1709778-supplement-5.pdf [file NIHMS1709778-supplement-5.pdf]

Putative targets of Swi4 found in YEASTRACT (<http://www.yeasttract.com/formfindregulated.php>)  
sorted by regulated process in GO slim mapper (<https://www.yeastgenome.org/goSlimMapper>).

We highlighted in "lipid metabolic process" the genes related to sphingolipid synthesis.

| <b>GO Terms from the biological process Ontology</b> |                                       |                                   |                                |
|------------------------------------------------------|---------------------------------------|-----------------------------------|--------------------------------|
| <b>GO Term (GO ID)</b>                               | <b>Genes Annotated to the GO Term</b> | <b>GO Term Usage in Gene List</b> | <b>Genome Frequency of Use</b> |

|                                          |                                                                                                                                                                                                                                                                                                                                                                                                                                                                                                                                                                                                                                               |                                  |                                           |
|------------------------------------------|-----------------------------------------------------------------------------------------------------------------------------------------------------------------------------------------------------------------------------------------------------------------------------------------------------------------------------------------------------------------------------------------------------------------------------------------------------------------------------------------------------------------------------------------------------------------------------------------------------------------------------------------------|----------------------------------|-------------------------------------------|
| <p>Response to chemical (GO:0042221)</p> | <p>ADR1, AFB1, AGA1, AGA2, AMF1, APE1, ASK10, ATX1, BAR1, BOP3, CAD1, CCP1, CDC14, CLN2, CTT1, CUZ1, DAK1, DDR2, DIC1, DSE1, ECM38, EDC3, ERT1, ERV1, ETT1, FAP7, FAR1, FES1, FKH1, FRT1, FUS3, GAD1, GLN1, GPA1, GPX1, GRE3, HAP5, HCM1, HSP104, HSP12, HSP26, HSP30, HSP42, ITC1, IXR1, MCK1, MCR1, MF(ALPHA)1, MFA1, MFA2, MHR1, MOT3, MRK1, MSB2, MSN2, NCE103, NCL1, NQM1, NRG2, NRT1, NTH1, ODC1, ODC2, ORM2, PDR1, PDR15, PDR18, PDR5, PRX1, PSR1, PTR3, QDR2, RDR1, RDS2, ROG3, ROQ1, ROX1, SCH9, SIS1, SKS1, SKY1, SRX1, SSA4, SST2, STE18, STE6, STF2, SVF1, SWI1, THI7, THI72, TMC1, TPO2, TPO3, TPO4, UGA2, UME6, URM1, USV1,</p> | <p>114 of 1023 genes, 11.14%</p> | <p>607 of 6439 annotated genes, 9.43%</p> |
|------------------------------------------|-----------------------------------------------------------------------------------------------------------------------------------------------------------------------------------------------------------------------------------------------------------------------------------------------------------------------------------------------------------------------------------------------------------------------------------------------------------------------------------------------------------------------------------------------------------------------------------------------------------------------------------------------|----------------------------------|-------------------------------------------|

|                                                        |                                                                                                                                                                                                                                                                                                                                                                                                                                                                                                                                                                                                                                               |                                |                                           |
|--------------------------------------------------------|-----------------------------------------------------------------------------------------------------------------------------------------------------------------------------------------------------------------------------------------------------------------------------------------------------------------------------------------------------------------------------------------------------------------------------------------------------------------------------------------------------------------------------------------------------------------------------------------------------------------------------------------------|--------------------------------|-------------------------------------------|
| <p>Transcription by RNA polymerase II (GO:0006366)</p> | <p>ABF2, ACE2, ADR1, AFT1, ARP9, ASF1, CAD1, DAT1, DOT6, ELP3, EMI2, ERT1, ETT1, FCP1, FKH1, FKH2, FMS1, GTS1, HAL1, HAP5, HCM1, HHF1, HHF2, HIR2, HMO1, HOS3, HTA1, HTB1, HTL1, IKI3, IME1, ITC1, IXR1, JHD1, MED1, MET32, MKS1, MOT3, MSN2, NAB3, NDD1, NHP10, NRG2, PDC2, PDP3, PDR1, PHD1, POP2, PSR1, PUT3, RAD2, RAP1, RDR1, RDS2, REF2, RFX1, RME1, RNT1, ROX1, RPB9, RPH1, RPT1, RRD1, RSC3, RSC58, RTR1, RTT109, RVB1, SCH9, SDD4, SKS1, SNF2, SOK2, SPT21, SSU72, STB1, SWI1, SWI4, TAF6, TBF1, TEC1, TFA2, TFB2, TFG2, THP2, TOA2, TYE7, UME6, USV1, WHI2, XBP1, YCR106W, YHP1, YKE2, YLL054C, YLR321C, YOR338W, YOX1, YPR009W</p> | <p>99 of 1023 genes, 9.68%</p> | <p>549 of 6439 annotated genes, 8.53%</p> |
|--------------------------------------------------------|-----------------------------------------------------------------------------------------------------------------------------------------------------------------------------------------------------------------------------------------------------------------------------------------------------------------------------------------------------------------------------------------------------------------------------------------------------------------------------------------------------------------------------------------------------------------------------------------------------------------------------------------------|--------------------------------|-------------------------------------------|

|                                        |                                                                                                                                                                                                                                                                                                                                                                                                                                                                                                                                                           |                                |                                           |
|----------------------------------------|-----------------------------------------------------------------------------------------------------------------------------------------------------------------------------------------------------------------------------------------------------------------------------------------------------------------------------------------------------------------------------------------------------------------------------------------------------------------------------------------------------------------------------------------------------------|--------------------------------|-------------------------------------------|
| <p>Mitotic cell cycle (GO:0000278)</p> | <p>ACE2, AFT1, ALK1, AMN1, APC2, APC5, ASE1, BUD4, BUD9, CBF2, CDC14, CDC45, CDC5, CDC6, CHL1, CHS2, CLB1, CLB2, CLB5, CLB6, CLN1, CLN2, CLN3, CTF18, CYK3, DAM1, DMA2, DSL1, DSN1, DUO1, FAR1, FKH1, FKH2, GIC2, GIN4, HIR2, HOS3, HSL1, IBD2, INN1, IRC15, MCD1, MCK1, MCM22, MCM3, MET32, MLC1, MSA1, MSB2, MUS81, NDD1, NET1, NIS1, NRM1, PEF1, PIN4, POL1, POL30, PSE1, RAX2, REF2, RME1, ROM2, RRD1, SDS23, SDS24, SFG1, SKG6, SMC4, SPC98, SPO12, SPR28, SRL3, STB1, STU2, SWI4, TOM1, TOS2, VHS1, WHI3, XBP1, YBL031W, YHP1, YOX1, ZDS2, ZPR1</p> | <p>86 of 1023 genes, 8.41%</p> | <p>392 of 6439 annotated genes, 6.09%</p> |
|----------------------------------------|-----------------------------------------------------------------------------------------------------------------------------------------------------------------------------------------------------------------------------------------------------------------------------------------------------------------------------------------------------------------------------------------------------------------------------------------------------------------------------------------------------------------------------------------------------------|--------------------------------|-------------------------------------------|

|                                             |                                                                                                                                                                                                                                                                                                                                                                                                                                                                                                                                                                   |                                |                                           |
|---------------------------------------------|-------------------------------------------------------------------------------------------------------------------------------------------------------------------------------------------------------------------------------------------------------------------------------------------------------------------------------------------------------------------------------------------------------------------------------------------------------------------------------------------------------------------------------------------------------------------|--------------------------------|-------------------------------------------|
| <p>Transmembrane transport (GO:0055085)</p> | <p>ADY2, AGP1, ALP1, AMF1, ATG22, ATP20, CYT1, DAL5, DIC1, ENB1, ERV1, FCY2, FEX1, FTR1, GLK1, HOT13, HSP30, HXK1, HXK2, HXT10, HXT11, HXT17, HXT2, HXT4, HXT7, MDH2, MEP1, MPH2, NCA3, NRT1, ODC1, ODC2, OPT2, PAM16, PAM18, PDR15, PDR18, PDR5, PEX14, PEX25, PHM7, PHO89, PHO90, PIC2, PNS1, PTR2, PUT4, QDR2, RCF1, RSN1, SBH2, SEC72, SIA1, SIT1, SKS1, SMF3, SSA4, SSU1, STE6, TAT1, TAT2, THI7, THI72, TIM12, TIM21, TIM50, TPO2, TPO3, TPO4, VPS73, XDJ1, YBR219C, YBR220C, YBR287W, YCR028C, YEA6, YIL170W, YIL171W, YLR152C, YPQ2, YRO2, ZRT1, ZRT2</p> | <p>83 of 1023 genes, 8.11%</p> | <p>456 of 6439 annotated genes, 7.08%</p> |
|---------------------------------------------|-------------------------------------------------------------------------------------------------------------------------------------------------------------------------------------------------------------------------------------------------------------------------------------------------------------------------------------------------------------------------------------------------------------------------------------------------------------------------------------------------------------------------------------------------------------------|--------------------------------|-------------------------------------------|

|                                                          |                                                                                                                                                                                                                                                                                                                                                                                                                                    |                                |                                           |
|----------------------------------------------------------|------------------------------------------------------------------------------------------------------------------------------------------------------------------------------------------------------------------------------------------------------------------------------------------------------------------------------------------------------------------------------------------------------------------------------------|--------------------------------|-------------------------------------------|
| <p>Cell wall organization or biogenesis (GO:0071554)</p> | <p>BAR1, CHS1, CHS2, CHS6, CIS3, CRH1, CTS1, CWH41, CWP1, CWP2, DSE1, DSE2, ECM19, ECM23, ECM9, EXG1, FKS1, GAS2, GAS3, GAS4, GFA1, GSC2, HPF1, HSP150, INA1, IRS4, KTR2, LDS2, LOH1, MSB2, NCA3, NCE102, NCW2, OSW2, PAU21, PIR1, PIR3, PIR5, PSA1, PST1, PUN1, RCR1, RDS2, RNT1, ROM2, SBE2, SCW4, SED1, SHC1, SIM1, SPI1, SRL1, SSP2, SUN4, SUR7, TIR3, TIR4, UTH1, WSC3, YBR067C, YGP1, YHR030C, YMR084W, YPK2, YPS1, YPS3</p> | <p>66 of 1023 genes, 6.45%</p> | <p>298 of 6439 annotated genes, 4.63%</p> |
|----------------------------------------------------------|------------------------------------------------------------------------------------------------------------------------------------------------------------------------------------------------------------------------------------------------------------------------------------------------------------------------------------------------------------------------------------------------------------------------------------|--------------------------------|-------------------------------------------|

|                                 |                                                                                                                                                                                                                                                                                                                                                                                             |                         |                                    |
|---------------------------------|---------------------------------------------------------------------------------------------------------------------------------------------------------------------------------------------------------------------------------------------------------------------------------------------------------------------------------------------------------------------------------------------|-------------------------|------------------------------------|
| Meiotic cell cycle (GO:0051321) | ADY2, AFT1, CDC14, CDC5, CLB1, CLB5, CLB6, CWP1, DSN1, EMI2, GAS2, GAS4, GSC2, HHF1, HHF2, HHT1, HHT2, HOP2, IME1, IRC15, LDS2, LOH1, MCK1, MCM22, MSC1, MSC6, MSH2, MSH6, MUS81, NKP1, OSW2, PAP2, POL1, POL30, RAD17, RDH54, RFA3, RIM4, RME1, RMR1, SHC1, SKI8, SMA1, SMA2, SMC4, SPC98, SPO12, SPO16, SPO20, SPR28, SPR6, SPS4, SSO2, SSP2, SUR7, TGS1, UME6, XRS2, YOR338W, YSW1, ZIP2 | 61 of 1023 genes, 5.96% | 321 of 6439 annotated genes, 4.99% |
|---------------------------------|---------------------------------------------------------------------------------------------------------------------------------------------------------------------------------------------------------------------------------------------------------------------------------------------------------------------------------------------------------------------------------------------|-------------------------|------------------------------------|

|                                            |                                                                                                                                                                                                                                                                                                                                                                                                   |                                |                                           |
|--------------------------------------------|---------------------------------------------------------------------------------------------------------------------------------------------------------------------------------------------------------------------------------------------------------------------------------------------------------------------------------------------------------------------------------------------------|--------------------------------|-------------------------------------------|
| <p>Chromatin organization (GO:0006325)</p> | <p>ADR1, APC5, ARP9, ASA1, ASF1, BDF1, BRE2, CDC45, CDC6, DIA2, DOT6, ESC8, FKH1, FKH2, HAT1, HEK2, HHF1, HHF2, HHO1, HHT1, HHT2, HIR2, HMO1, HOS3, HST2, HTA1, HTA2, HTB1, HTL1, IRS4, ITC1, JHD1, MCM3, MCM5, MCM7, MSH2, MSN2, NET1, NHP10, NNT1, ORC4, POL30, RAP1, RNT1, RPH1, RSC3, RSC58, RTT109, RVB1, SCS2, SNF2, SPT21, SWC5, SWI1, TAF6, TBF1, UAF30, UME6, YLR321C, YOR338W, ZDS2</p> | <p>61 of 1023 genes, 5.96%</p> | <p>308 of 6439 annotated genes, 4.78%</p> |
|--------------------------------------------|---------------------------------------------------------------------------------------------------------------------------------------------------------------------------------------------------------------------------------------------------------------------------------------------------------------------------------------------------------------------------------------------------|--------------------------------|-------------------------------------------|



|                                                    |                                                                                                                                                                                                                                                                                                                                                                                                        |                                |                                           |
|----------------------------------------------------|--------------------------------------------------------------------------------------------------------------------------------------------------------------------------------------------------------------------------------------------------------------------------------------------------------------------------------------------------------------------------------------------------------|--------------------------------|-------------------------------------------|
| <p>Carbohydrate metabolic process (GO:0005975)</p> | <p>AMS1, ATG11, CIT1, CIT2, CRH1, CTS1, CWH41, DAK1, DSF1, EMI2, ENO1, ERR1, ERT1, EXG1, FKS1, GAL10, GAS2, GAS3, GAS4, GLK1, GND2, GPM2, GPP2, GRE3, GSC2, GSY2, GUT2, HXK1, HXK2, ICL1, IGD1, IMA5, IPK1, MAL12, MAL32, MDH2, NQM1, OPI10, PDC2, PFK27, PGM2, PIB1, PIG1, PKP1, PYC1, SCW4, SGA1, SIM1, SOL4, SUC2, SUN4, TDH3, TYE7, UTH1, XKS1, XYL2, YBR056W, YIL167W, YJR096W, YNR071C, ZWF1</p> | <p>61 of 1023 genes, 5.96%</p> | <p>248 of 6439 annotated genes, 3.85%</p> |
|----------------------------------------------------|--------------------------------------------------------------------------------------------------------------------------------------------------------------------------------------------------------------------------------------------------------------------------------------------------------------------------------------------------------------------------------------------------------|--------------------------------|-------------------------------------------|

|                              |                                                                                                                                                                                                                                                                                                                                                                                             |                         |                                    |
|------------------------------|---------------------------------------------------------------------------------------------------------------------------------------------------------------------------------------------------------------------------------------------------------------------------------------------------------------------------------------------------------------------------------------------|-------------------------|------------------------------------|
| rRNA processing (GO:0006364) | BCD1, BMT5, BRX1, CIC1, DBP3, DBP6, DBP8, DIP2, E MG1, ENP1, FAF1, FAP7, FCF1, HCR1, IMP3, IMP4, IPI1, IPI3, LOC1, LSM7, LSM8, MAK5, MRT4, MTR3, NIP7, NOC3, NOC4, NOG1, NOP16, NOP56, NOP8, NOP9, POP4, POP7, PRP43, REX2, RNT1, RPL35A, RPL7A, RPL7B, RPL8A, RPL8B, RPS1A, RPS20, RPS7B, RPS9A, RPS9B, RRB1, RRP45, RRP5, RRP6, RRP7, RTC3, SRD1, TOM1, UTP15, UTP23, YDL229W, YTM1, ZUO1 | 60 of 1023 genes, 5.87% | 356 of 6439 annotated genes, 5.53% |
|------------------------------|---------------------------------------------------------------------------------------------------------------------------------------------------------------------------------------------------------------------------------------------------------------------------------------------------------------------------------------------------------------------------------------------|-------------------------|------------------------------------|

|                                   |                                                                                                                                                                                                                                                                                                                                                                                                     |                                |                                           |
|-----------------------------------|-----------------------------------------------------------------------------------------------------------------------------------------------------------------------------------------------------------------------------------------------------------------------------------------------------------------------------------------------------------------------------------------------------|--------------------------------|-------------------------------------------|
| <p>Ion transport (GO:0006811)</p> | <p>ADY2, AFT1, AMF1, ATP20, ATX1, CSR1, CYT1, DAL5, DIC1, EMP70, ENB1, FAA4, FEX1, FIT2, FRE3, FRE4, FRE5, FTR1, HSP30, HXT10, HXT11, HXT17, HXT2, HXT4, HXT7, MDM10, MDM35, MEP1, MPH2, NCA3, NCE102, OPT2, PHM7, PHO89, PHO90, PIC2, PRY1, PRY2, PTR2, QDR2, RCF1, RCH1, RSB1, RSN1, SFK1, SIA1, SIT1, SMF3, SSU1, TDH3, TPO2, TPO3, TPO4, VPS20, YBR219C, YBR220C, YCR028C, YRO2, ZRT1, ZRT2</p> | <p>60 of 1023 genes, 5.87%</p> | <p>349 of 6439 annotated genes, 5.42%</p> |
|-----------------------------------|-----------------------------------------------------------------------------------------------------------------------------------------------------------------------------------------------------------------------------------------------------------------------------------------------------------------------------------------------------------------------------------------------------|--------------------------------|-------------------------------------------|

|                                              |                                                                                                                                                                                                                                                                                                                                                                                      |                                |                                           |
|----------------------------------------------|--------------------------------------------------------------------------------------------------------------------------------------------------------------------------------------------------------------------------------------------------------------------------------------------------------------------------------------------------------------------------------------|--------------------------------|-------------------------------------------|
| <p>Regulation of cell cycle (GO:0051726)</p> | <p>AMN1, APC2, APC5, CDC14, CDC33, CDC45, CDC5, CDC6, CIP1, CLB1, CLB2, CLB5, CLB6, CLN1, CLN2, CLN3, DAM1, DBF2, DMA2, DSL1, DUO1, FAR1, FKH1, FKH2, FUS3, GIC2, GIN4, HSL1, HUG1, IBD2, IME1, IRC15, MET32, MSA1, MUS81, NET1, PCL1, PCL2, PCL5, PIN4, PSE1, RAD17, REF2, RME1, ROM2, RSC3, RTT107, SDS23, SDS24, SKG6, SPO12, SPO16, TOS2, WHI2, WHI3, YHR030C, YLR321C, ZDS2</p> | <p>58 of 1023 genes, 5.67%</p> | <p>309 of 6439 annotated genes, 4.80%</p> |
|----------------------------------------------|--------------------------------------------------------------------------------------------------------------------------------------------------------------------------------------------------------------------------------------------------------------------------------------------------------------------------------------------------------------------------------------|--------------------------------|-------------------------------------------|

|                                      |                                                                                                                                                                                                                                                                                                                                                                                                         |                         |                                    |
|--------------------------------------|---------------------------------------------------------------------------------------------------------------------------------------------------------------------------------------------------------------------------------------------------------------------------------------------------------------------------------------------------------------------------------------------------------|-------------------------|------------------------------------|
| Lipid metabolic process (GO:0006629) | ACH1, AFT1, AIM45, ALG14, ARE2, <b>AUR1</b> , CLD1, <b>CSH1</b> , CSR1, DCI1, EEB1, ELO1, ERG28, ERG3, ERG5, ERG9, FAA4, FMP30, GAB1, GPC1, GPI15, GPI18, GTS1, <b>IPT1</b> , KAP95, <b>LAC1</b> , LPX1, LRO1, MCR1, MOT3, OPI10, ORM2, OSH6, PLB1, PLB2, PLB3, SCH9, SCS2, SFK1, <b>SUR1</b> , <b>SUR2</b> , TCB2, TGL5, TLG2, TML25, <b>TSC10</b> , UME6, URA7, VAC7, <b>YDC1</b> , YJU3, <b>YPC1</b> | 52 of 1023 genes, 5.08% | 340 of 6439 annotated genes, 5.28% |
|--------------------------------------|---------------------------------------------------------------------------------------------------------------------------------------------------------------------------------------------------------------------------------------------------------------------------------------------------------------------------------------------------------------------------------------------------------|-------------------------|------------------------------------|

|                         |                                                                                                                                                                                                                                                                                                                                           |                         |                                    |
|-------------------------|-------------------------------------------------------------------------------------------------------------------------------------------------------------------------------------------------------------------------------------------------------------------------------------------------------------------------------------------|-------------------------|------------------------------------|
| DNA repair (GO:0006281) | BDF1, BLM10, CDC45, CHL1, CTF18, DDR48, DIN7, HAT1, HHT1, HHT2, HTA1, HTA2, HTB1, HUG1, IXR1, KRE29, MCD1, MCK1, MCM3, MCM5, MCM7, MPH1, MSH2, MSH6, MUS81, NHP10, PAP2, POL1, POL30, POL4, PSF3, PSO2, RAD17, RAD2, RAD27, RDH54, REV7, RFA3, RPB9, RRD1, RRM3, RTT107, RTT109, RVB1, SXLX5, SNF2, SRS2, TFB2, UNG1, XRS2, YLR321C, YRA1 | 52 of 1023 genes, 5.08% | 303 of 6439 annotated genes, 4.71% |
|-------------------------|-------------------------------------------------------------------------------------------------------------------------------------------------------------------------------------------------------------------------------------------------------------------------------------------------------------------------------------------|-------------------------|------------------------------------|

|                                           |                                                                                                                                                                                                                                                                                                                                                                                            |                                    |                                           |
|-------------------------------------------|--------------------------------------------------------------------------------------------------------------------------------------------------------------------------------------------------------------------------------------------------------------------------------------------------------------------------------------------------------------------------------------------|------------------------------------|-------------------------------------------|
| <p>Organelle<br/>fission (GO:0048285)</p> | <p>AFT1, AMN1, APC2, APC5,<br/>ASE1, CBF2, CDC14, CDC<br/>5, CHL1, CLB1, CLB2, CLB<br/>5, CTF18, DAM1, DBF2, D<br/>MA2, DSL1, DSN1, GIC2, H<br/>IR2, HOP2, IBD2, IME1, IR<br/>C15, MCD1, MCK1, MCM2<br/>2, MSC1, MSC6, MUS81, N<br/>ET1, NIS1, PEX25, POL30,<br/>PSE1, RAD17, RDH54, RFA<br/>3, RIM4, RME1, RMR1, SD<br/>S23, SDS24, SKI8, SMC4, S<br/>PO12, SPO16, YBL031W, ZI<br/>P2</p> | <p>49 of 1023 genes,<br/>4.79%</p> | <p>271 of 6439 annotated genes, 4.21%</p> |
|-------------------------------------------|--------------------------------------------------------------------------------------------------------------------------------------------------------------------------------------------------------------------------------------------------------------------------------------------------------------------------------------------------------------------------------------------|------------------------------------|-------------------------------------------|

|                                                                            |                                                                                                                                                                                                                                                                                                                        |                                |                                           |
|----------------------------------------------------------------------------|------------------------------------------------------------------------------------------------------------------------------------------------------------------------------------------------------------------------------------------------------------------------------------------------------------------------|--------------------------------|-------------------------------------------|
| <p>Nucleobase-containing small molecule metabolic process (GO:0055086)</p> | <p>ADE13, ADE17, ATP20, BNA1, BNA4, CAB5, CDC21, CDC8, CIT1, CPA1, CPA2, CYT1, DAS2, EMI2, ENO1, ERR1, FAA4, FAP7, GFA1, GLK1, GPM2, HXK1, HXK2, ISN1, NCA3, NMA1, NNR1, NNR2, PFK27, PGM2, PHM8, PSA1, RNR1, RNR2, RNR3, RNR4, SNZ2, SNZ3, SPE2, TDH3, TYE7, URA1, URA3, URA4, URA6, URA7, YGK1, YMR084W, YOR111W</p> | <p>49 of 1023 genes, 4.79%</p> | <p>223 of 6439 annotated genes, 3.46%</p> |
|----------------------------------------------------------------------------|------------------------------------------------------------------------------------------------------------------------------------------------------------------------------------------------------------------------------------------------------------------------------------------------------------------------|--------------------------------|-------------------------------------------|



|                                                          |                                                                                                                                                                                                                                                                                                                        |                                |                                           |
|----------------------------------------------------------|------------------------------------------------------------------------------------------------------------------------------------------------------------------------------------------------------------------------------------------------------------------------------------------------------------------------|--------------------------------|-------------------------------------------|
| <p>Regulation of organelle organization (GO:0033043)</p> | <p>ADR1, AMN1, APC2, APC5, ASF1, ATG11, BDF1, CDC14, CDC45, CDC5, CDC6, CLB1, CLB2, CLB5, DAM1, DMA2, DSL1, DUO1, ENO1, EST1, FKH1, FKH2, GIC2, GYP7, HHO1, HIR2, HSP82, HST2, IBD2, IME1, MCM5, NET1, OPT2, PEF1, PKP1, PSE1, RAP1, REF2, RME1, ROM2, SDS23, SDS24, SLA1, SPO12, SPO16, TBF1, TGS1, XBP1, YOR338W</p> | <p>49 of 1023 genes, 4.79%</p> | <p>342 of 6439 annotated genes, 5.31%</p> |
|----------------------------------------------------------|------------------------------------------------------------------------------------------------------------------------------------------------------------------------------------------------------------------------------------------------------------------------------------------------------------------------|--------------------------------|-------------------------------------------|

|                                                    |                                                                                                                                                                                                                                                                                                       |                         |                                    |
|----------------------------------------------------|-------------------------------------------------------------------------------------------------------------------------------------------------------------------------------------------------------------------------------------------------------------------------------------------------------|-------------------------|------------------------------------|
| Cellular amino acid metabolic process (GO:0006520) | AAT1, ADI1, ALD2, ALD3, ALT1, ARG1, ARG7, ASP3-3, BNA1, BNA4, CAR1, CHA1, CPA1, CPA2, GAD1, GDH3, GFA1, GLN1, ILV5, IRC7, LEU1, LYS2, LYS5, MAE1, MET13, MET3, MET32, MMF1, MSE1, MSY1, PUT1, PUT3, SCH9, SER2, SNO3, SNZ1, SNZ2, SNZ3, SRY1, STR3, THR1, UGA1, UGA2, URA7, YHR033W, YIL167W, YMR084W | 47 of 1023 genes, 4.59% | 222 of 6439 annotated genes, 3.45% |
|----------------------------------------------------|-------------------------------------------------------------------------------------------------------------------------------------------------------------------------------------------------------------------------------------------------------------------------------------------------------|-------------------------|------------------------------------|

|                                       |                                                                                                                                                                                                                                                                                                      |                                |                                           |
|---------------------------------------|------------------------------------------------------------------------------------------------------------------------------------------------------------------------------------------------------------------------------------------------------------------------------------------------------|--------------------------------|-------------------------------------------|
| <p>DNA recombination (GO:0006310)</p> | <p>CDC45, CDC5, CTF18, DIN7, HHO1, HO, HOP2, HST2, IRC15, KRE29, MCD1, MCM3, MCM5, MCM7, MHR1, MPH1, MSC1, MSC6, MSH2, MSH6, MUS81, NHP10, PAP2, PSF3, RAD17, RAD27, RDH54, RFA3, RIM4, RMR1, RTT109, SKI8, SNF2, SPO16, SRS2, THP2, TLC1, XRS2, YLR035C-A, YRF1-2, YRF1-4, YRF1-5, YRF1-7, ZIP2</p> | <p>44 of 1023 genes, 4.30%</p> | <p>252 of 6439 annotated genes, 3.91%</p> |
|---------------------------------------|------------------------------------------------------------------------------------------------------------------------------------------------------------------------------------------------------------------------------------------------------------------------------------------------------|--------------------------------|-------------------------------------------|

|                                                              |                                                                                                                                                                                                                                                                                          |                                |                                           |
|--------------------------------------------------------------|------------------------------------------------------------------------------------------------------------------------------------------------------------------------------------------------------------------------------------------------------------------------------------------|--------------------------------|-------------------------------------------|
| <p>Cytoskeleton organization (GO:0007010)</p>                | <p>AFR1, APC2, ARP9, ASE1, BBP1, BNI5, BUD4, CBF2, CDC14, CDC5, CHS2, CIN1, CLB1, CLB2, CLB5, CTF13, DAM1, DMA2, DUO1, GIC2, GIN4, HCM1, HSP42, IRC15, LIA1, MLC1, NET1, PCL1, PCL2, REF2, ROM2, RRD1, SFK1, SLA1, SLM1, SPC29, SPC42, SPC98, SPR28, STU2, SUR7, WHI2, YBL031W, YTA6</p> | <p>44 of 1023 genes, 4.30%</p> | <p>275 of 6439 annotated genes, 4.27%</p> |
| <p>Cellular response to DNA damage stimulus (GO:0006974)</p> | <p>ALK1, BDF1, BLM10, DDR2, DIN7, HAT1, HSP30, HTA1, HTA2, HTL1, HUG1, KRE29, MCD1, MCK1, MPH1, MSH2, MSH6, MUS81, PIN4, PLM2, POL30, POL4, PSO2, RAD17, RAD2, RAD27, RAP1, RDH54, REV7, RPB9, RRM3, RTT107, RTT109, RVB1, SLX5, SML1, SRS2, TFB2, TOS4, UNG1, XRS2, YIM1</p>            | <p>42 of 1023 genes, 4.11%</p> | <p>238 of 6439 annotated genes, 3.70%</p> |

|                                                           |                                                                                                                                                                                                                                                                                           |                                |                                           |
|-----------------------------------------------------------|-------------------------------------------------------------------------------------------------------------------------------------------------------------------------------------------------------------------------------------------------------------------------------------------|--------------------------------|-------------------------------------------|
| <p>Mitochondrion organization (GO:0007005)</p>            | <p>ABF2, ATG11, ATG12, ATG3, ATG33, ATG41, ATG8, ATP20, CDC14, ERV1, FMC1, HCM1, HOT13, HSP82, ILV5, MDM1, MDM10, MDM35, MHR1, MIC12, MIC27, NGR1, PAM16, PAM18, PET117, PET191, PKP1, PUF3, RCF1, REX2, RRM3, SED1, SML1, STI1, SUN4, TIM12, TIM21, TIM50, UTH1, WHI2, XDJ1, YOR019W</p> | <p>42 of 1023 genes, 4.11%</p> | <p>284 of 6439 annotated genes, 4.41%</p> |
| <p>Monocarboxylic acid metabolic process (GO:0032787)</p> | <p>ACH1, AIM45, ALD2, ALD3, ALD5, ASP3-3, BNA1, BNA4, CSR1, DCI1, EEB1, ELO1, EMI2, ENO1, ERR1, FAA4, FDH1, FMS1, GLK1, GND2, GOR1, GPM2, HSP32, HSP33, HXK1, HXK2, ICL1, IRC7, MAE1, PFK27, PYC1, SPE2, SPE3, SPE4, SRY1, TDH3, TML25, TYE7, UGA1, UGA2</p>                              | <p>40 of 1023 genes, 3.91%</p> | <p>170 of 6439 annotated genes, 2.64%</p> |

|                                                      |                                                                                                                                                                                                                                                                  |                                |                                           |
|------------------------------------------------------|------------------------------------------------------------------------------------------------------------------------------------------------------------------------------------------------------------------------------------------------------------------|--------------------------------|-------------------------------------------|
| <p>Peptidyl-amino acid modification (GO:0018193)</p> | <p>ALK1, ARD1, ASF1, BRE2, CPR8, DBF2, EFM4, EFM5, EFM6, ELP3, FPR2, HAT1, HHF1, HHF2, HSL1, KAP95, KRE29, LIA1, MCK1, NNT1, PFA5, PKP1, PSE1, RKM4, RRD1, RTT109, RVB1, SCH9, SFM1, SKY1, SLX5, SPO16, TAF6, VHS1, YCK1, YIR042C, YOR338W, YPK2, YPK3, ZIP2</p> | <p>40 of 1023 genes, 3.91%</p> | <p>250 of 6439 annotated genes, 3.88%</p> |
| <p>Protein phosphorylation (GO:0006468)</p>          | <p>ALK1, ASF1, ATG11, CDC5, CIP1, CLB1, CLB2, CLB5, CLB6, CLN1, CLN2, CLN3, CRP1, DBF2, FAR1, FMP48, FUS3, GIN4, HSL1, ISR1, MCK1, MRK1, NCE102, PCL1, PCL2, PCL5, PKP1, SCH9, SKS1, SKY1, SPL2, SSP2, TFB2, VHS1, YCK1, YHR030C, YPK2, YPK3, YPL150W</p>        | <p>39 of 1023 genes, 3.81%</p> | <p>247 of 6439 annotated genes, 3.84%</p> |

|                                           |                                                                                                                                                                                                                                              |                         |                                    |
|-------------------------------------------|----------------------------------------------------------------------------------------------------------------------------------------------------------------------------------------------------------------------------------------------|-------------------------|------------------------------------|
| Chromosome segregation (GO:0007059)       | AFT1, APC2, APC5, ASE1, CBF2, CDC14, CDC5, CHL1, CLB1, CLB2, CLB5, CTF18, DAM1, DMA2, DSL1, DSN1, DUO1, ESC8, GIP4, HIR2, HOP2, IBD2, IRC15, MCD1, MCK1, MCM22, MUS81, NNF1, POL30, RDH54, SDS23, SDS24, SMC4, SPO16, YBL031W, YLR321C, ZIP2 | 37 of 1023 genes, 3.62% | 219 of 6439 annotated genes, 3.40% |
| Response to oxidative stress (GO:0006979) | ASK10, ATX1, CCP1, CTT1, DDR2, ERV1, FAP7, FCP1, GAD1, GPX1, GRE3, HCM1, HSP104, HSP12, HSP30, HSP42, MCR1, MHR1, MSN2, NCE103, NCL1, NQM1, PIN4, PRX1, SCH9, SNF2, SRX1, SVF1, UGA2, URM1, XBP1, YDL124W, YDR222W, YHB1, YJR096W, ZWF1      | 36 of 1023 genes, 3.52% | 131 of 6439 annotated genes, 2.03% |

|                              |                                                                                                                                                                                                                               |                         |                                    |
|------------------------------|-------------------------------------------------------------------------------------------------------------------------------------------------------------------------------------------------------------------------------|-------------------------|------------------------------------|
| DNA replication (GO:0006260) | CDC45, CDC6, CLB5, CLB6, CTF18, DIA2, FKH1, FKH2, IPI1, IPI3, MCM3, MCM5, MCM7, MHR1, MPH1, MSH2, MSH6, NOC3, ORC4, POL1, POL30, PSF3, RAD27, RFA3, RIM4, RNR1, RNR2, RNR3, RNR4, RRM3, RSC3, SLD7, SML1, SNF2, SWI1, YLR321C | 36 of 1023 genes, 3.52% | 151 of 6439 annotated genes, 2.35% |
| Sporulation (GO:0043934)     | BDF1, CWP1, EMI2, GAS2, GAS4, GSC2, HHH1, HHH2, HHT1, HHT2, IME1, LDS2, LOH1, MCK1, OSW2, PRB1, RIM4, SGA1, SHC1, SMA1, SMA2, SPO12, SPO16, SPO20, SPR28, SPR6, SPS4, SSO2, SSP2, SUR7, TGL5, UBX6, XRS2, YOR338W, YSW1       | 35 of 1023 genes, 3.42% | 169 of 6439 annotated genes, 2.62% |



|                                                             |                                                                                                                                                                                                                                       |                         |                                    |
|-------------------------------------------------------------|---------------------------------------------------------------------------------------------------------------------------------------------------------------------------------------------------------------------------------------|-------------------------|------------------------------------|
| Protein targeting (GO:0006605)                              | APE1, ATG11, ATG12, ATG3, ATG41, ATG8, COG2, ERV1, HOT13, HSP82, KAP95, MDH2, MDM10, MRS6, PAM16, PAM18, PEP12, PEP4, PEX14, PEX25, PFA5, SBH2, SEC72, SPL2, SRP68, SRP72, SSA4, STI1, TIM12, TIM21, TIM50, TLG2, TRS130, VPS73, XDJ1 | 35 of 1023 genes, 3.42% | 259 of 6439 annotated genes, 4.02% |
| Generation of precursor metabolites and energy (GO:0006091) | AIM45, ATF1, ATG11, CYT1, DAK1, EMI2, ENO1, ERR1, GLK1, GND2, GPM2, GSY2, HXK1, HXK2, IGD1, IRC15, MFA2, NCA3, NDE1, NQM1, PDC2, PFK27, PGM2, PIG1, RGI1, RGI2, SGA1, SOL4, TDH3, TKL1, TYE7, YMR315W, ZWF1                           | 33 of 1023 genes, 3.23% | 139 of 6439 annotated genes, 2.16% |

|                                                                                |                                                                                                                                                                                                                   |                                |                                           |
|--------------------------------------------------------------------------------|-------------------------------------------------------------------------------------------------------------------------------------------------------------------------------------------------------------------|--------------------------------|-------------------------------------------|
| <p>Proteolysis involved in cellular protein catabolic process (GO:0051603)</p> | <p>AMN1, APC2, APC5, ATG42, BLM10, COS1, COS2, COS3, COS4, COS6, COS8, CP S1, CUZ1, DIA2, DMA2, FE S1, GGA2, LUG1, MGR3, MUB1, PEP4, PUP3, ROQ1, RPN10, RPT1, RQC2, SIS1, SLX5, SSE2, TOM1, UBX6, VPS20, YUH1</p> | <p>33 of 1023 genes, 3.23%</p> | <p>264 of 6439 annotated genes, 4.10%</p> |
| <p>Cofactor metabolic process (GO:0051186)</p>                                 | <p>ALD2, ALD3, ARA2, BNA1, BNA4, BUD17, CAB5, CCP1, CIT1, COQ11, CTT1, ECM38, FAA4, FMS1, FOL1, FOL2, HEM13, MET13, NMA1, NNR1, NNR2, PUF3, SNO3, SNZ1, SNZ2, SNZ3, SPE2, SPE3, SPE4, THI11, THI12</p>            | <p>31 of 1023 genes, 3.03%</p> | <p>196 of 6439 annotated genes, 3.04%</p> |

|                                                                |                                                                                                                                                                                                                    |                                |                                           |
|----------------------------------------------------------------|--------------------------------------------------------------------------------------------------------------------------------------------------------------------------------------------------------------------|--------------------------------|-------------------------------------------|
| <p>Cytoplasmic translation (GO:0002181)</p>                    | <p>CDC33, GCD1, GCD11, GIS2, HCR1, PRT1, RPL11B, RPL13A, RPL22A, RPL22B, RPL28, RPL32, RPL35A, RPL43A, RPL5, RPL7A, RPL7B, RPL8A, RPL8B, RPL9B, RPS1A, RPS20, RPS26A, RPS7B, RPS9A, TIF34, TIF5, TRM7, YDL229W</p> | <p>29 of 1023 genes, 2.83%</p> | <p>205 of 6439 annotated genes, 3.18%</p> |
| <p>Regulation of protein modification process (GO:0031399)</p> | <p>ACM1, ASF1, ATG11, CIP1, CLB1, CLB2, CLB5, CLB6, CLN1, CLN2, CLN3, FAR1, FUS3, GIP4, KAP95, NCE102, NET1, PCL1, PCL2, PCL5, FIG1, PSE1, RRD1, SPL2, SPO16, SSP2, XBP1, YOR338W, ZIP2</p>                        | <p>29 of 1023 genes, 2.83%</p> | <p>220 of 6439 annotated genes, 3.42%</p> |

|                                                 |                                                                                                                                                                                   |                         |                                    |
|-------------------------------------------------|-----------------------------------------------------------------------------------------------------------------------------------------------------------------------------------|-------------------------|------------------------------------|
| RNA catabolic process (GO:0006401)              | CDC33, DBR1, DCS1, EDC2, EDC3, HEK2, IPK1, LSM7, MRT4, MTR3, NAB3, NGL1, NGR1, PAP2, PIN4, POP2, POP4, POP7, PUB1, PUF3, RAD27, RNT1, RRP45, RRP6, SKI8, TRF5, VTS1, WHI3         | 28 of 1023 genes, 2.74% | 161 of 6439 annotated genes, 2.50% |
| Ribosomal large subunit biogenesis (GO:0042273) | BCD1, BRX1, CIC1, DBP3, DBP6, IPI1, IPI3, LOC1, MAK5, MRT4, NIP7, NOC2, NOC3, NOG1, NOP16, NOP8, P RP43, RPL11B, RPL35A, RPL5, RPL7A, RPL7B, RPL8A, RPL8B, RRP5, SYO1, TOM1, YTM1 | 28 of 1023 genes, 2.74% | 124 of 6439 annotated genes, 1.93% |
| Response to osmotic stress (GO:0006970)         | APE1, CDC14, CTT1, EDC3, FRT1, GLN1, GPP2, GRE3, HAL1, HSP104, HSP12, HSP26, HSP30, HSP42, HSP82, MCK1, MOT3, MRK1, MSB2, MSN2, NRG2, PSR1, ROX1, RRD1, SCH9, SIS1, USV1          | 27 of 1023 genes, 2.64% | 98 of 6439 annotated genes, 1.52%  |

|                                                  |                                                                                                                                                             |                         |                                    |
|--------------------------------------------------|-------------------------------------------------------------------------------------------------------------------------------------------------------------|-------------------------|------------------------------------|
| Regulation of DNA metabolic process (GO:0051052) | CDC6, EST1, FKH1, FKH2, HHO1, HSP82, HST2, IPI1, IPI3, IXR1, MCM5, MPH1, MSH2, MSH6, PAP2, POL30, RRM3, RTT107, RTT109, SLD7, SPO16, SRS2, TBF1, TGS1, VTS1 | 25 of 1023 genes, 2.44% | 96 of 6439 annotated genes, 1.49%  |
| Golgi vesicle transport (GO:0048193)             | ARF1, ATG8, BET5, CHS6, COG2, CSR1, DSL1, ERP3, GGA2, GOT1, GRH1, GTS1, MRS6, MUK1, PEF1, PEP12, SEC16, SFB2, SNC2, SSO2, TLG2, TRS130, TRS23, UFE1, YET3   | 25 of 1023 genes, 2.44% | 204 of 6439 annotated genes, 3.17% |
| Cytokinesis (GO:0000910)                         | APC2, BUD4, BUD9, CDC14, CDC5, CHS2, CYK3, DBF2, DMA2, INN1, MLC1, MSB2, NET1, NIS1, PEF1, RAX2, REF2, RGL1, ROM2, SKG6, SPR28, SUN4, TOS2, UTH1, YHR030C   | 25 of 1023 genes, 2.44% | 106 of 6439 annotated genes, 1.65% |

|                                                 |                                                                                                                                                              |                         |                                    |
|-------------------------------------------------|--------------------------------------------------------------------------------------------------------------------------------------------------------------|-------------------------|------------------------------------|
| Ribosomal small subunit biogenesis (GO:0042274) | DBP8, DIP2, EMG1, ENP1, FAF1, FAP7, FCF1, HCR1, IMP3, IMP4, LOC1, LSM7, NOC4, NOP9, PRP43, RPS1A, RPS20, RPS7B, RPS9A, RPS9B, RRP5, RRP7, TOM1, UTP15, UTP23 | 25 of 1023 genes, 2.44% | 148 of 6439 annotated genes, 2.30% |
| tRNA processing (GO:0008033)                    | DUS4, ELP3, GCD10, IKI3, LSM7, LSM8, MSS1, NAB3, NCL1, PAP2, POP4, POP7, RPC11, RPR2, TAD3, TAN1, TGS1, THG1, TRM1, TRM2, TRM44, TRM7, TRM8, URM1            | 24 of 1023 genes, 2.35% | 132 of 6439 annotated genes, 2.05% |
| Regulation of translation (GO:0006417)          | AEP1, CDC33, EDC2, ETT1, FES1, GCD1, GCD11, GCD2, GCD6, GIS2, HEK2, LOC1, NCL1, NGR1, POP2, PUF3, RPS9A, RPS9B, RQC2, TIF5, VTS1, WHI3, YOR302W              | 23 of 1023 genes, 2.25% | 194 of 6439 annotated genes, 3.01% |

|                                     |                                                                                                                                               |                         |                                    |
|-------------------------------------|-----------------------------------------------------------------------------------------------------------------------------------------------|-------------------------|------------------------------------|
| Response to starvation (GO:0042594) | AFT1, ASP3-3, ATG11, ATG8, DCS1, DDR2, ERT1, GCD1, IRS4, MSN2, PEP4, PHM8, PHO5, PRB1, SDS23, SDS24, SEA4, SNF2, SWI1, YDL229W, YOR062C, ZPR1 | 22 of 1023 genes, 2.15% | 78 of 6439 annotated genes, 1.21%  |
| Protein folding (GO:0006457)        | ACL4, AHA1, BTN2, CIN1, CIN2, CPR8, FMO1, HSP104, HSP26, HSP32, HSP33, HSP42, HSP82, SIS1, SSA4, SSE2, STI1, TCP1, XDJ1, YDL229W, YKE2, ZUO1  | 22 of 1023 genes, 2.15% | 121 of 6439 annotated genes, 1.88% |
| Conjugation (GO:0000746)            | AFB1, AFR1, AGA1, AGA2, ASG7, BAR1, CLN2, DSE1, FAR1, FUS1, FUS2, FUS3, GPA1, HBT1, MF(ALPHA)1, MFA1, MFA2, ROG3, SCW4, SST2, STE18, YPS1     | 22 of 1023 genes, 2.15% | 118 of 6439 annotated genes, 1.83% |

|                                                                           |                                                                                                                                    |                         |                                    |
|---------------------------------------------------------------------------|------------------------------------------------------------------------------------------------------------------------------------|-------------------------|------------------------------------|
| Protein modification by small protein conjugation or removal (GO:0070647) | ACM1, AMN1, APC2, APC5, ASF1, DIA2, DMA2, KAP95, KRE29, LUG1, MPE1, PIB1, PSE1, RFA3, SLX5, SPO16, TOM1, ULA1, URM1, YUH1, ZIP2    | 21 of 1023 genes, 2.05% | 221 of 6439 annotated genes, 3.43% |
| DNA-templated transcription, elongation (GO:0006354)                      | ARP9, ASF1, FKH1, FKH2, HIR2, HTL1, JHD1, MTF1, PDP3, POP2, RPA49, RPB9, RPH1, RSC3, RSC58, SSU72, TFG2, THP2, TYE7, YKE2, YLR321C | 21 of 1023 genes, 2.05% | 107 of 6439 annotated genes, 1.66% |
| mRNA processing (GO:0006397)                                              | CUS2, DBR1, DRN1, EDC2, FKH1, GTS1, LSM7, LSM8, MPE1, MTF2, NAB3, NGR1, PRP43, PRP9, REF2, SKY1, SMB1, SMD2, SNT309, SSU72         | 20 of 1023 genes, 1.96% | 227 of 6439 annotated genes, 3.53% |
| Vitamin metabolic process (GO:0006766)                                    | ALD2, ALD3, BNA1, BNA4, BUD17, FMS1, FOL1, FOL2, PDC2, PHO3, RIB4, SNO3, SNZ1, SNZ2, SNZ3, SPE2, SPE3, SPE4, THI11, THI12          | 20 of 1023 genes, 1.96% | 60 of 6439 annotated genes, 0.93%  |



|                                        |                                                                                                                                           |                         |                                    |
|----------------------------------------|-------------------------------------------------------------------------------------------------------------------------------------------|-------------------------|------------------------------------|
| RNA modification (GO:0009451)          | BMT5, DUS4, ELP3, EMG1, GCD10, IKI3, MSS1, NCL1, NOP56, PAP2, TAD3, TAN1, TGS1, THG1, TRM1, TRM2, TRM44, TRM7, TRM8, URM1                 | 20 of 1023 genes, 1.96% | 180 of 6439 annotated genes, 2.80% |
| Organelle assembly (GO:0070925)        | ASE1, ATG11, ATG12, ATG3, ATG41, ATG8, BNI5, CBF2, CDC14, CDC5, CLB1, CLB2, CLB5, CTF13, DMA2, EDC3, GIN4, PUB1, SPC98, THP2              | 20 of 1023 genes, 1.96% | 120 of 6439 annotated genes, 1.86% |
| Mitochondrial translation (GO:0032543) | AEP3, IMG2, MHR1, MMF1, MRP4, MRPL20, MRPL25, MRPL28, MRPL40, MRPL44, MRPL50, MRPL8, MRPS16, MRPS8, MSD1, MSE1, MSY1, MTF2, PTH4, YLR139C | 20 of 1023 genes, 1.96% | 176 of 6439 annotated genes, 2.73% |
| Regulation of transport (GO:0051049)   | AFT1, ASK10, FKS1, FUS3, GPA1, KAP95, NCE102, OPT2, PEF1, PHO90, RCF1, ROG3, ROM2, SCS2, SEC16, SFK1, SKS1, SKY1, YHR030C                 | 19 of 1023 genes, 1.86% | 110 of 6439 annotated genes, 1.71% |

|                                                       |                                                                                                                               |                         |                                    |
|-------------------------------------------------------|-------------------------------------------------------------------------------------------------------------------------------|-------------------------|------------------------------------|
| Telomere organization (GO:0032200)                    | BRE2, EST1, HEK2, HSP82, NHP10, PSO2, RAP1, RFA3, RRM3, SLX5, TBF1, TGS1, THP2, TLC1, XRS2, YRF1-2, YRF1-4, YRF1-5, YRF1-7    | 19 of 1023 genes, 1.86% | 84 of 6439 annotated genes, 1.30%  |
| Nucleobase-containing compound transport (GO:0015931) | ENP1, FCY2, HEK2, KAP95, LOC1, NIC96, NRT1, NUP100, PIN4, PSE1, RPS26A, SIS1, THP2, TOM1, VPS20, YBR219C, YBR220C, YEA6, YRA1 | 19 of 1023 genes, 1.86% | 178 of 6439 annotated genes, 2.76% |
| Response to heat (GO:0009408)                         | AHA1, DDR2, HSP104, HSP12, HSP26, HSP30, HSP42, HSP82, MCK1, MRK1, MSN2, NUP100, PSR1, SSA4, SWI4, WHI2, WSC3                 | 17 of 1023 genes, 1.66% | 79 of 6439 annotated genes, 1.23%  |
| Cellular ion homeostasis (GO:0006873)                 | AFT1, ATX1, COS3, DBF2, EMP70, ENB1, ERV1, FRE3, FRE4, FRE5, PDR5, PGM2, PIC2, RCH1, SIT1, SKY1, SMF3                         | 17 of 1023 genes, 1.66% | 160 of 6439 annotated genes, 2.48% |

|                                   |                                                                                                           |                         |                                    |
|-----------------------------------|-----------------------------------------------------------------------------------------------------------|-------------------------|------------------------------------|
| Histone modification (GO:0016570) | ALK1, ARD1, ASF1, BRE2, ELP3, FMS1, HAT1, HHF1, HHF2, HOS3, JHD1, RPH1, RTT109, RVB1, TAF6, XBP1, YOR338W | 17 of 1023 genes, 1.66% | 143 of 6439 annotated genes, 2.22% |
| Pseudohyphal growth (GO:0007124)  | DBR1, DSE2, ECM23, EMP70, FKH1, FKH2, FLO11, IME1, MKS1, NRG2, PHD1, SFG1, SKS1, SOK2, TEC1, UME6, WHI3   | 17 of 1023 genes, 1.66% | 75 of 6439 annotated genes, 1.16%  |
| Vacuole organization (GO:0007033) | ATG11, ATG12, ATG3, ATG41, ATG8, CDC14, CLN3, ENO1, GYP7, OPT2, PBI2, PEP12, SFK1, VAC17, VAC7, VTC2      | 16 of 1023 genes, 1.56% | 106 of 6439 annotated genes, 1.65% |
| Endocytosis (GO:0006897)          | FKS1, GTS1, OSH6, ROG3, ROM2, SDS24, SLA1, SNC2, SUR7, SVL3, SWH1, TLG2, WHI2, YCK1, YCR028C              | 15 of 1023 genes, 1.47% | 124 of 6439 annotated genes, 1.93% |
| Vesicle organization (GO:0016050) | MST28, PEF1, PEP12, PRM8, SEC16, SFB2, SNC2, SPO20, SSO2, TLG2, UFE1, UIP3, VPS20, YAR028W, YCR007C       | 15 of 1023 genes, 1.47% | 104 of 6439 annotated genes, 1.62% |

|                                        |                                                                                              |                         |                                    |
|----------------------------------------|----------------------------------------------------------------------------------------------|-------------------------|------------------------------------|
| Organelle fusion (GO:0048284)          | CLN3, ENO1, FUS2, GPA1, GYP7, OPT2, PBI2, PEP12, SNC2, SPO20, SSO2, TLG2, UFE1, VTC2         | 14 of 1023 genes, 1.37% | 105 of 6439 annotated genes, 1.63% |
| Endosomal transport (GO:0016197)       | BTN2, COS1, COS2, COS3, COS4, COS6, COS8, EMP70, GGA2, GOT1, MUK1, SLM1, SNA2, TRS130        | 14 of 1023 genes, 1.37% | 104 of 6439 annotated genes, 1.62% |
| Carbohydrate transport (GO:0008643)    | ASK10, GLK1, HXK1, HXK2, HXT10, HXT11, HXT17, HXT2, HXT4, HXT7, MPH2, SKS1, YIL170W, YIL171W | 14 of 1023 genes, 1.37% | 49 of 6439 annotated genes, 0.76%  |
| Protein dephosphorylation (GO:0006470) | CDC14, CLB2, FCP1, GIP4, NET1, PIG1, PSR1, REF2, RRD1, RTR1, SIA1, SSU72, TIM50, WHI2        | 14 of 1023 genes, 1.37% | 95 of 6439 annotated genes, 1.48%  |
| Lipid transport (GO:0006869)           | CSR1, FAA4, MDM10, MDM35, NCE102, OPT2, OSH6, PRY1, PRY2, RSB1, SCS2, SFK1, SWH1, TCB2       | 14 of 1023 genes, 1.37% | 72 of 6439 annotated genes, 1.12%  |
| Cellular respiration (GO:0045333)      | CIT1, CIT2, CYT1, GDS1, HAP5, ICL1, MDH2, ODC1, ODC2, PUF3, SDH4, YLR139C                    | 12 of 1023 genes, 1.17% | 111 of 6439 annotated genes, 1.72% |

|                                                |                                                                           |                         |                                    |
|------------------------------------------------|---------------------------------------------------------------------------|-------------------------|------------------------------------|
| RNA splicing (GO:0008380)                      | CUS2, DBR1, DRN1, GTS1, LSM7, LSM8, PRP43, PRP9, SKY1, SMB1, SMD2, SNT309 | 12 of 1023 genes, 1.17% | 156 of 6439 annotated genes, 2.42% |
| Cell morphogenesis (GO:0000902)                | AFR1, CIN2, FKS1, FUS1, FUS2, GIC2, GSC2, HBT1, OPT2, RAX2, YCK1, YPK2    | 12 of 1023 genes, 1.17% | 49 of 6439 annotated genes, 0.76%  |
| Translational initiation (GO:0006413)          | AEP3, CDC33, GCD1, GCD11, GCD2, GCD6, HCR1, PR T1, SIS1, TIF34, TIF5      | 11 of 1023 genes, 1.08% | 70 of 6439 annotated genes, 1.09%  |
| Protein acylation (GO:0043543)                 | AKR2, ARD1, ASF1, ELP3, HAT1, PFA5, RTT109, RVB1, TAF6, YIR042C, YOR338W  | 11 of 1023 genes, 1.08% | 80 of 6439 annotated genes, 1.24%  |
| Ribosome assembly (GO:0042255)                 | BRX1, IPI1, IPI3, MRT4, NIP7, RPL11B, RPL5, RPS26A, RRP5, RRP7, TIF5      | 11 of 1023 genes, 1.08% | 80 of 6439 annotated genes, 1.24%  |
| SnoRNA processing (GO:0043144)                 | MTR3, NAB3, PAP2, POP4, POP7, REF2, RNT1, RPR2, RRP45, RRP6, TRF5         | 11 of 1023 genes, 1.08% | 45 of 6439 annotated genes, 0.70%  |
| Oligosaccharide metabolic process (GO:0009311) | AMS1, CWH41, HSP104, IM A5, MAL12, MAL32, MPH2, NTH1, PGM2, SUC2, YML100W | 11 of 1023 genes, 1.08% | 30 of 6439 annotated genes, 0.47%  |

|                                                                |                                                                 |                         |                                   |
|----------------------------------------------------------------|-----------------------------------------------------------------|-------------------------|-----------------------------------|
| Amino acid transport (GO:0006865)                              | AGP1, ALP1, ATG22, BTN2, ODC1, ODC2, PUT4, TAT1, TAT2, YPQ2     | 10 of 1023 genes, 0.98% | 57 of 6439 annotated genes, 0.89% |
| Invasive growth in response to glucose limitation (GO:0001403) | DIA2, DSE1, EMP70, FLO11, FUS3, GPG1, SNF2, TEC1, URM1, WHI3    | 10 of 1023 genes, 0.98% | 54 of 6439 annotated genes, 0.84% |
| Protein maturation (GO:0051604)                                | ARD1, ATG42, HO, HSP82, KEX2, LIA1, MAP1, PEP4, YIR042C, YPS1   | 10 of 1023 genes, 0.98% | 95 of 6439 annotated genes, 1.48% |
| DNA-templated transcription, initiation (GO:0006352)           | HMO1, MTF1, RPA49, RPB9, RPT1, SSU72, TAF6, TFA2, TFG2, TOA2    | 10 of 1023 genes, 0.98% | 82 of 6439 annotated genes, 1.27% |
| Nucleus organization (GO:0006997)                              | CDC5, FUS2, GPA1, KAP95, MDM1, NET1, NIC96, SYH1, TGS1, TOM1    | 10 of 1023 genes, 0.98% | 70 of 6439 annotated genes, 1.09% |
| Protein glycosylation (GO:0006486)                             | ALG14, CWH41, GFA1, KTR2, MNN1, OCH1, OST4, OST5, PSA1, YMR084W | 10 of 1023 genes, 0.98% | 77 of 6439 annotated genes, 1.20% |
| Protein alkylation (GO:0008213)                                | BRE2, EFM4, EFM5, EFM6, HHF1, HHF2, NNT1, RKM4, SFM1            | 9 of 1023 genes, 0.88%  | 59 of 6439 annotated genes, 0.92% |
| Ribosomal subunit export from nucleus (GO:0000054)             | ARB1, LOC1, MRT4, NIC96, NOG1, NOP9, YDL229W, ZUO1              | 8 of 1023 genes, 0.78%  | 53 of 6439 annotated genes, 0.82% |

|                                                          |                                             |                        |                                    |
|----------------------------------------------------------|---------------------------------------------|------------------------|------------------------------------|
| Protein lipidation (GO:0006497)                          | AKR2, ATG12, ATG3, GAB1, GPI15, GPI18, PFA5 | 7 of 1023 genes, 0.68% | 49 of 6439 annotated genes, 0.76%  |
| Membrane fusion (GO:0061025)                             | ATG8, PEP12, SNC2, SPO20, SSO2, TLG2, UFE1  | 7 of 1023 genes, 0.68% | 54 of 6439 annotated genes, 0.84%  |
| Organelle inheritance (GO:0048308)                       | ABF2, INP2, MDM1, PEP12, SCS2, VAC17, VAC7  | 7 of 1023 genes, 0.68% | 56 of 6439 annotated genes, 0.87%  |
| Peroxisome organization (GO:0007031)                     | ADR1, DSL1, GPX1, INP2, MDH2, PEX14, PEX25  | 7 of 1023 genes, 0.68% | 51 of 6439 annotated genes, 0.79%  |
| Transposition (GO:0032196)                               | DBR1, FUS3, RTT107, RTT109, TEC1, YLR035C-A | 6 of 1023 genes, 0.59% | 114 of 6439 annotated genes, 1.77% |
| Transcription by RNA polymerase I (GO:0006360)           | HMO1, RPA43, RPA49, SCH9, UAF30, UTP15      | 6 of 1023 genes, 0.59% | 69 of 6439 annotated genes, 1.07%  |
| DNA-templated transcription, termination (GO:0006353)    | FKH1, NAB3, REF2, RNT1, RPC11, SSU72        | 6 of 1023 genes, 0.59% | 42 of 6439 annotated genes, 0.65%  |
| Cell budding (GO:0007114)                                | BUD4, GIN4, NIS1, PEF1, RAX2, URM1          | 6 of 1023 genes, 0.59% | 59 of 6439 annotated genes, 0.92%  |
| Exocytosis (GO:0006887)                                  | OSH6, SNC2, SPO20, SSO2, SWH1               | 5 of 1023 genes, 0.49% | 54 of 6439 annotated genes, 0.84%  |
| tRNA aminoacylation for protein translation (GO:0006418) | MSD1, MSE1, MSY1, VAS1, WRS1                | 5 of 1023 genes, 0.49% | 37 of 6439 annotated genes, 0.57%  |
| Translational elongation (GO:0006414)                    | RQC2, YDL229W, ZUO1                         | 3 of 1023 genes, 0.29% | 338 of 6439 annotated genes, 5.25% |

|                                                  |             |                        |                                   |
|--------------------------------------------------|-------------|------------------------|-----------------------------------|
| Transcription by RNA polymerase III (GO:0006383) | RPC11, SCH9 | 2 of 1023 genes, 0.20% | 42 of 6439 annotated genes, 0.65% |
| Membrane invagination (GO:0010324)               | ATG8        | 1 of 1023 genes, 0.10% | 1 of 6439 annotated genes, 0.02%  |
