# Supplementary material
Source: PubMed Central journal article supplement (PMC8512607)
Supplement: NIHMS1709778-supplement-8.pdf [file NIHMS1709778-supplement-8.pdf]

**Table S3.** Primers used in qRT-PCR experiments

| <b>Gene</b>  | <b>Systematic name</b> | <b>Primer (5'-3')a</b>                                   |
|--------------|------------------------|----------------------------------------------------------|
| <i>ACT1</i>  | <i>YFL039C</i>         | (F) GCCTTCTACGTTTCCATCCA<br>(R) GGCCAAATCGATTCTCAAAA     |
| <i>AUR1</i>  | <i>YKL004W</i>         | (F) TTGCTGGTTATGGTGGTCAA<br>(R) GCAGCCAATGGATCACTCTT     |
| <i>CLN2</i>  | <i>YPL256C</i>         | (F) ATCACGGGTCCATAACAGCAA<br>(R) GGCACTGCTAGCATTTACCGC   |
| <i>CSH1</i>  | <i>YBR161W</i>         | (F) CTACGGGCCCCTTATTTCATT<br>(R) TGCCAGAGGAACCTTTAGA     |
| <i>IPT1</i>  | <i>YDR072C</i>         | (F) CAGCGAAGATGAAGGTGACA<br>(R) GCCGGTGCTTCTTTTCATTAC    |
| <i>LAC1</i>  | <i>YKL008C</i>         | (F) CAATAAAGCCAAGCCCTTCA<br>(R) GCCTTTTAGCAGCCGTTTAA     |
| <i>LAG1</i>  | <i>YHL003C</i>         | (F) CGCCATGTCGTGAATATCAG<br>(R) CGTCCTTTTGGATACCTTGC     |
| <i>SUR1</i>  | <i>YPL057C</i>         | (F) GACTAATCCAGATGCACCTCC<br>(R) CTCGTCCGTCGTCCATAGGATGT |
| <i>SUR2</i>  | <i>YDR297W</i>         | (F) GTGGGTATGCTTTGCCACTT<br>(R) TGGTGACACGTCTTTGCTTC     |
| <i>TSC10</i> | <i>YBR265W</i>         | (F) ACTACCCATGCGACTTGTCC<br>(R) GTGGTGTTTCCTTGGTTTGCT    |
| <i>YDC1</i>  | <i>YPL087W</i>         | (F) CTCGCTGGTTGGTATTGGTT<br>(R) TGGACAACGTAAATCCA        |
| <i>YPC1</i>  | <i>YBR183W</i>         | (F) TGGGGAGAAACAACCTTCCAC<br>(R) CCTACTCCGACCAAACCGTA    |
